# Supplementary material
Source: PubMed Central journal article supplement (PMC6221048)
Supplement: HEP-68-1376-s001.pdf [file HEP-68-1376-s001.pdf]

## Supplemental Material

### **Metabolic Features of Nonalcoholic Fatty Liver (NAFL) in a Multiethnic Cohort of Obese Adolescents**

Domenico Tricò, MD;<sup>1,2</sup> Sonia Caprio, MD;<sup>3</sup> Giuseppina Rosaria Umamo, MD;<sup>3,4</sup> Bridget Pierpont, MA;<sup>3</sup> Jessica Nouws, PhD;<sup>3</sup> Alfonso Galderisi, MD;<sup>3</sup> Grace Kim, MD;<sup>5</sup> Mariana M. Mata, PhD;<sup>3</sup> Nicola Santoro, MD, PhD.<sup>3</sup>

1. Department of Internal Medicine, Yale University School of Medicine, New Haven (CT)
2. Department of Clinical and Experimental Medicine, University of Pisa, Pisa, Italy
3. Department of Pediatrics, Yale University School of Medicine, New Haven (CT)
4. Department of Pediatrics, University of Campania “L. Vanvitelli”, Napoli, Italy
5. Seattle Children’s Hospital, Seattle (WA)

#### **Correspondence**

Nicola Santoro, Yale School of Medicine, 330 Cedar Street, P.O. Box 208064, New Haven, CT 06520, Tel: +01 203 737 6356, Fax: +01 203 785 6421, email: nicola.santoro@yale.edu

Sonia Caprio, Yale School of Medicine, 330 Cedar Street, P.O. Box 208064, New Haven, CT 06520, Tel: +01 203 785 5692, Fax: +01 203 785 6421, email: sonia.caprio@yale.edu

## Supplemental Methods

### *Metabolic Studies*

All metabolic studies were performed at the Yale Center for Clinical Investigation at 8.00 am following a 10 – 12 h overnight fast. A standard OGTT (1.75 g/Kg body weight, up to 75 g) was performed. Blood samples for determination of glucose, insulin, and C-peptide were drawn at –15, 0, 30, 60, 90, 120 and 180 min (1). Type 2 diabetes and conditions of increased risk for diabetes (prediabetes) were defined according to the American Diabetes Association criteria (2). Insulin sensitivity was assessed by the whole-body insulin sensitivity index (WBISI), which we have previously validated by comparison with the euglycemic-hyperinsulinemic clamp studies in obese adolescents (3). The insulinogenic index (IGI), which represents early phase insulin secretion and is a commonly used index of beta cell function, was calculated from the OGTT data as follows:  $IGI = \Delta\text{insulin (0 – 30 min) in microunits per milliliter divided by the glucose (0–30 min) in milligrams per deciliter}$ . To better describe the state of insulin secretion in our population we also included the disposition index (DI), which derives from a non-linear hyperbola-like curve and provides an integrate picture of glucose tolerance including both insulin sensitivity and insulin secretion. The DI was calculated as the product of the IGI and the WBISI, based on the curvilinear relation of these OGTT derived parameters previously described by our group in obese children and adolescents (3).

Total body composition was measured by dual-energy x-ray absorptiometry with a Hologic scanner (Boston, MA).

## Supplemental Figure 1

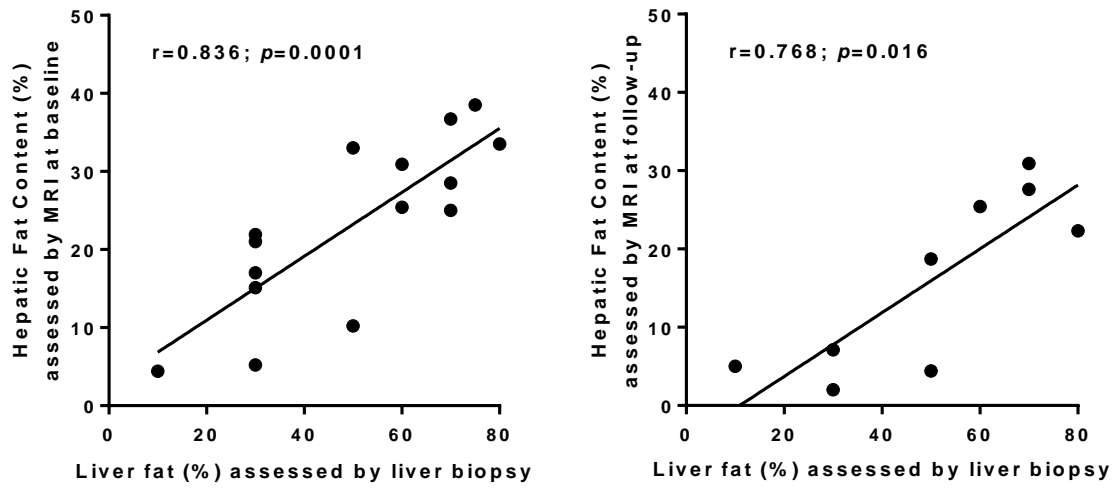

**Supplemental Figure 1.** Correlation between liver fat assessed by liver biopsy at baseline and hepatic fat content assessed by magnetic resonance imaging (MRI) either at baseline ( $n=15$ ) or after a 2 year follow up ( $n=9$ ) in obese adolescents, tested using Spearman's rank correlations.

**Supplemental Table 1.** Baseline characteristics of the overall study cohort and of the subgroups of subjects who underwent longitudinal assessments or liver biopsy.

|                                              | <b>Overall<br/>Study Cohort<br/>(n=503)</b> | <b>Longitudinal<br/>Cohort<br/>(n=133)</b> | <b>Subjects<br/>with Liver Biopsy<br/>(n=15)</b> |
|----------------------------------------------|---------------------------------------------|--------------------------------------------|--------------------------------------------------|
| <b>CLINICAL FEATURES</b>                     |                                             |                                            |                                                  |
| Age (years)                                  | 13.66±2.84                                  | 13.82±2.62                                 | 13.61±2.26                                       |
| Sex (M/F) [%]                                | 206/297 [41.0/59.0]                         | 58/75 [43.6/56.4]                          | 8/7 [53.3/46.7]                                  |
| Race (white/black/Hispanic) [%]              | 191/134/178 [38.0/26.6/35.4]                | 53/32/48 [39.8/24.1/36.1]                  | 4/0/11 [26.7/0/73.3] <sup>a, b</sup>             |
| z-score Body Mass Index                      | 2.22±0.41                                   | 2.26±0.42                                  | 2.33±0.34                                        |
| Body Mass Index (kg/m <sup>2</sup> )         | 33.39±6.38                                  | 34.12±6.10                                 | 34.89±6.73                                       |
| Tanner Stage (1/2/3/4/5) [%]                 | [9.5/15.9/17.9/18.9/37.8]                   | [7.5/10.5/21.8/18.8/41.4]                  | [0.0/6.7/20.0/20.0/53.3]                         |
| Systolic Blood Pressure (mmHg)               | 118.19±11.10                                | 118.73±10.08                               | 122.75±14.80                                     |
| Diastolic Blood Pressure (mmHg)              | 67.76±7.96                                  | 68.98±8.21                                 | 69.25±9.00                                       |
| <b>GLUCOSE METABOLISM</b>                    |                                             |                                            |                                                  |
| Fasting glucose (mg/dl)                      | 91.35±8.66                                  | 94.48±8.79                                 | 95.00±15.46                                      |
| Fasting insulin (μU/ml)                      | 34.48±22.28                                 | 35.98±20.34                                | 52.83±34.37 <sup>a, b</sup>                      |
| Fasting C peptide (pmol/l)                   | 1187.9±526.2                                | 1187.3±411.9                               | 1556.9±532.0 <sup>a, b</sup>                     |
| 2 h glucose (mg/dl)                          | 124.70±31.71                                | 129.14±25.75                               | 161.44±37.22 <sup>a, b</sup>                     |
| Hemoglobin A <sub>1c</sub> (%)               | 5.51±0.25                                   | 5.52±0.38                                  | 5.69±0.50                                        |
| Whole Body Insulin Sensitivity Index (WBISI) | 1.80±1.12                                   | 1.65±0.91                                  | 0.86±0.59 <sup>a, b</sup>                        |
| Insulinogenic index (IGI)                    | 4.74±3.57                                   | 4.62±4.01                                  | 4.58±4.29                                        |
| Disposition Index (DI)                       | 7.34±5.99                                   | 6.32±5.34                                  | 3.29±1.82 <sup>a, b</sup>                        |
| <b>LIPID PROFILE</b>                         |                                             |                                            |                                                  |
| Total Cholesterol (mg/dL)                    | 154.15±30.27                                | 155.66±32.25                               | 157.00±27.81                                     |
| HDL Cholesterol (mg/dL)                      | 43.47±10.18                                 | 44.13±11.64                                | 38.38±6.83 <sup>a, b</sup>                       |
| LDL Cholesterol (mg/dL)                      | 89.78±25.38                                 | 90.44±27.45                                | 85.00±26.05                                      |
| Triglycerides (mg/dL)                        | 104.48±62.67                                | 110.50±80.07                               | 156.42±82.37 <sup>a, b</sup>                     |
| <b>BODY FAT DISTRIBUTION</b>                 |                                             |                                            |                                                  |
| Hepatic Fat Fraction (%)                     | 8.68±11.41                                  | 9.63±12.66                                 | 23.09±10.92 <sup>a, b</sup>                      |
| HFF > 5.5% (no/yes) [%]                      | [58.4/41.6]                                 | [57.1/42.9]                                | [13.3/86.7] <sup>a, b</sup>                      |
| Visceral Fat (cm <sup>2</sup> )              | 58.41±27.67                                 | 63.87±27.63                                | 75.54±32.2 <sup>a</sup>                          |
| Subcutaneous Fat (cm <sup>2</sup> )          | 491.77±198.72                               | 517.83±187.42                              | 495.81±223.06                                    |
| <b>LIVER ENZYMES</b>                         |                                             |                                            |                                                  |
| Alanine Transaminase (U/L)                   | 28.87±25.27                                 | 29.03±28.24                                | 156.21±94.48 <sup>a, b</sup>                     |
| Aspartate Transaminase (U/L)                 | 25.31±12.95                                 | 25.05±13.50                                | 91.14±59.72 <sup>a, b</sup>                      |
| γ-Glutamyl Transferase (U/L)                 | 22.46±12.07                                 | 23.12±18.47                                | 70.83±55.65 <sup>a, b</sup>                      |
| Alkaline Phosphatase (U/L)                   | 191.12±100.64                               | 175.95±98.85                               | 205.21±113.66                                    |

There were not statistically significant differences between the overall study cohort and the longitudinal cohort.

<sup>a</sup>  $p < 0.05$  for the difference between the overall study cohort and the subgroup of subjects with liver biopsy.

<sup>b</sup>  $p < 0.05$  for the difference between the longitudinal cohort and the subgroup of subjects with liver biopsy.

**Supplemental Table 2.** Histological and genetic characteristics of the subgroup of subjects who underwent liver biopsy ( $n = 15$ ).

| <b>Histological / Genetic Variable</b>   | <b><i>n</i> (%)</b> |
|------------------------------------------|---------------------|
| Diagnosis                                |                     |
| Not steatohepatitis                      | -                   |
| Borderline                               | 3 (20)              |
| Steatohepatitis                          | 12 (80)             |
| NAS                                      |                     |
| 0-2                                      | -                   |
| 3-4                                      | 3 (20)              |
| 5-8                                      | 12 (80)             |
| Steatosis grade                          |                     |
| 0 - < 5%                                 | -                   |
| 1 - 5-33%                                | 6 (40)              |
| 2 - 34-66%                               | 4 (27)              |
| 3 - > 66%                                | 5 (33)              |
| Lobular inflammation                     |                     |
| 0 - none                                 | 1 (7)               |
| 1 - < 2 foci per 200× field              | 12 (80)             |
| 2 - 2-4 foci per 200× field              | 2 (13)              |
| 3 - > 4 foci per 200× field              | -                   |
| Portal inflammation                      |                     |
| 0 - None to minimal                      | 13 (87)             |
| 1 - Greater than minimal                 | 2 (13)              |
| Ballooning                               |                     |
| 0 - none                                 | 3 (20)              |
| 1 - few balloon cells                    | 8 (53)              |
| 2 - many cells                           | 4 (27)              |
| Fibrosis                                 |                     |
| 0- none                                  | 1 (7)               |
| 1 - perisinusoidal or periportal         | 6 (40)              |
| 2 - perisinusoidal and portal/periportal | 7 (47)              |
| 3 - bridging                             | 1 (7)               |
| 4 - cirrhosis                            | -                   |
| <i>PNPLA3</i> rs738409 <sup>a</sup>      |                     |
| CC                                       | 4 (29)              |
| CG                                       | 4 (29)              |
| GG                                       | 6 (43)              |
| <i>GCKR</i> rs1260326 <sup>a</sup>       |                     |
| CC                                       | 5 (36)              |
| CT                                       | 2 (14)              |
| TT                                       | 7 (50)              |
| <i>TM6SF2</i> rs58542926 <sup>a</sup>    |                     |
| CC                                       | 6 (43)              |
| CT                                       | 8 (57)              |
| TT                                       | -                   |

Biopsies were scored according to the NASH CRN Scoring System (4-6).

<sup>a</sup> Genotyping was performed in 14 subjects.

## References

1. O'Malley G, Santoro N, Northrup V, D'Adamo E, Shaw M, Eldrich S, Caprio S. High normal fasting glucose level in obese youth: a marker for insulin resistance and beta cell dysregulation. *Diabetologia* 2010;53:1199-1209.
2. American Diabetes Association. Classification and Diagnosis of Diabetes. *Diabetes Care* 2017;40:S11-S24.
3. Yeckel CW, Weiss R, Dziura J, Taksali SE, Dufour S, Burgert TS, Tamborlane WV, et al. Validation of insulin sensitivity indices from oral glucose tolerance test parameters in obese children and adolescents. *J Clin Endocrinol Metab* 2004;89:1096-1101.
4. Kleiner DE, Brunt EM, Van Natta M, Behling C, Contos MJ, Cummings OW, Ferrell LD, et al. Design and validation of a histological scoring system for nonalcoholic fatty liver disease. *Hepatology* 2005;41:1313-1321.
5. Brunt EM, Janney CG, Di Bisceglie AM, Neuschwander-Tetri BA, Bacon BR. Nonalcoholic steatohepatitis: a proposal for grading and staging the histological lesions. *Am J Gastroenterol* 1999;94:2467-2474.
6. Brunt EM, Kleiner DE, Wilson LA, Belt P, Neuschwander-Tetri BA, Network NCR. Nonalcoholic fatty liver disease (NAFLD) activity score and the histopathologic diagnosis in NAFLD: distinct clinicopathologic meanings. *Hepatology* 2011;53:810-820.
